# Supplementary material
Source: publisher site journal article supplement (https://www.spandidos-publications.com/7158/downloadSupplementary)
Supplement: Supplementary file 1 [file downloadSupplementary]

## Sheet: Sheet1
Table SV. Prediction of drug sensitivity in gene signature and stage-free nomogram based on "pRRophetic" R package.
Drugs	Nomogram			Risk score signature
	R	Spearman-P	Survival-P	R	Spearman-P	Survival-P
(5Z)−7−Oxozeaenol	0.26	1.4x10^−09	1.3x10^−06	0.22	5.8x10^−07	4.5x10^−06
AICAR	0.15	0.00088	0.00013	0.22	2.9x10^−07	7.8x10^−05
AT-7519	−0.23	1.9x10^−07	4.7x10^−06	-	-	-
BEZ235	0.17	1e−x10^−04	0.00039	0.19	8.2x10^−06	0.00026
BMS-754807	0.2	4.4x10^−06	2.7x10^−08	-	-	-
BX−912	− 0.18	3.5x10^−05	0.00024	− 0.22	4.2x10^−07	4.7x10^−06
CEP−701	0.25	5.8x10^−09	1.4x10^−08	0.23	9.3x10^−08	5.5x10^−05
CI−1040	0.22	1.2x10^−06	0.00035	0.17	1e−x10^−04	0.00015
Dasatinib	−0.26	1.9x10^−09	1.8x10^−06	−0.22	5.9x10^−07	1.2x10^−05
DMOG	-	-	-	− 0.15	0.00044	0.00085
FK866	0.21	1.3x10^−06	0.00018	0.16	0.00024	0.00092
Foretinib	−0.21	1.2x10^−06	1.5x10^−06	−0.24	4.9x10^−08	3.1x10^−05
Genentech Cpd 10	− 0.2	7e−x10^−06	0.00079	− 0.18	6.2x10^−05	0.00037
HG-5-113-01	0.16	0.00037	0.0005	-	-	-
GSK1070916	-	-	-	−0.18	5.4x10^−05	0.00032
JNJ−26854165	0.23	7.4x10^−08	7.5x10^−06	0.28	3.9x10^−11	5.1x10^−08
KU−55933	0.22	5.8x10^−07	4.3x10^−07	0.25	5.1x10^−09	6.3x10^−08
Lisitinib	0.15	0.00093	3.2x10^−05	-	-	-
Mitomycin C	0.14	0.00099	2.1x10^−05	0.22	3.2x10^−07	0.00012
NG-25	− 0.15	7e−x10^−04	0.00091	-	-	-
PD−0325901	0.26	4.1x10^−09	5e−x10^−06	0.17	9.1x10^−05	0.00061
PD−0332991	0.26	1.2x10^−09	4.8x10^−09	0.27	7.3x10^−10	1e−x10^−07
PF−4708671	-	-	-	0.19	2.1x10^−05	0.00011
PHA−665752	0.26	2.4x10^−09	7.2x10^−08	0.18	6.2x10^−05	0.00011
Phenformin	0.29	1.9x10^−11	1.9x10^−07	0.22	2.9x10^−07	2.6x10^−05
Salubrinal	0.18	3.9x10^−05	6.2x10^−05	0.23	6.9x10^−08	3.1x10^−05
SB590885	-	-	-	0.2	5e−x10^−06	0.00018
SGC0946	0.15	0.00064	3.6x10^−05	0.26	2.4x10^−09	2.2x10^−05
SN−38	0.23	1.5x10^−07	2.6x10^−07	0.22	5.4x10^−07	2e−x10^−06
Tamoxifen	0.21	1.4x10^−06	0.0001	0.2	4.2x10^−06	5.5x10^−05
Temozolomide	0.28	1.4x10^−10	4.8x10^−09	0.29	2.1x10^−11	3.5x10^−08
THZ−2−49	-	-	-	0.17	9.9x10^−05	0.00012
Trametinib	0.24	1.5x10^−07	0.00019	0.16	0.00053	0.00042
Tubastatin A	0.18	2.9x10^−05	1.7x10^−05	0.19	9.6x10^−06	5.5x10^−05
Vinblastine	-	-	-	0.17	0.00011	0.00055
WH−4−023	−0.29	1.1x10^−11	4.4x10^−08	−0.2	7.6x10^−06	1.8x10^−05
XAV939	0.27	8.7x10^−10	7.8x10^−08	0.26	2.1x10^−09	1.2x10^−08
XL−184	− 0.17	8.9x10^−05	0.0009	− 0.18	5.2x10^−05	0.00051
XMD11−85h	0.17	0.00014	8e−x10^−06	0.18	4.4x10^−05	0.00095
YM201636	− 0.23	1.3x10^−07	4e−x10^−05	-	-	-
ZM−447439	0.18	3.8x10^−05	6.8x10^−07	0.21	1.7x10^−06	0.00014
